# Supplementary material for: Transcriptome profiling of Puccinellia tenuiflora during seed germination under a long-term saline-alkali stress
Source: PubMed Central journal article supplement (PMC6637651; doi:10.1186/s12864-019-5860-5), 2019-07-17

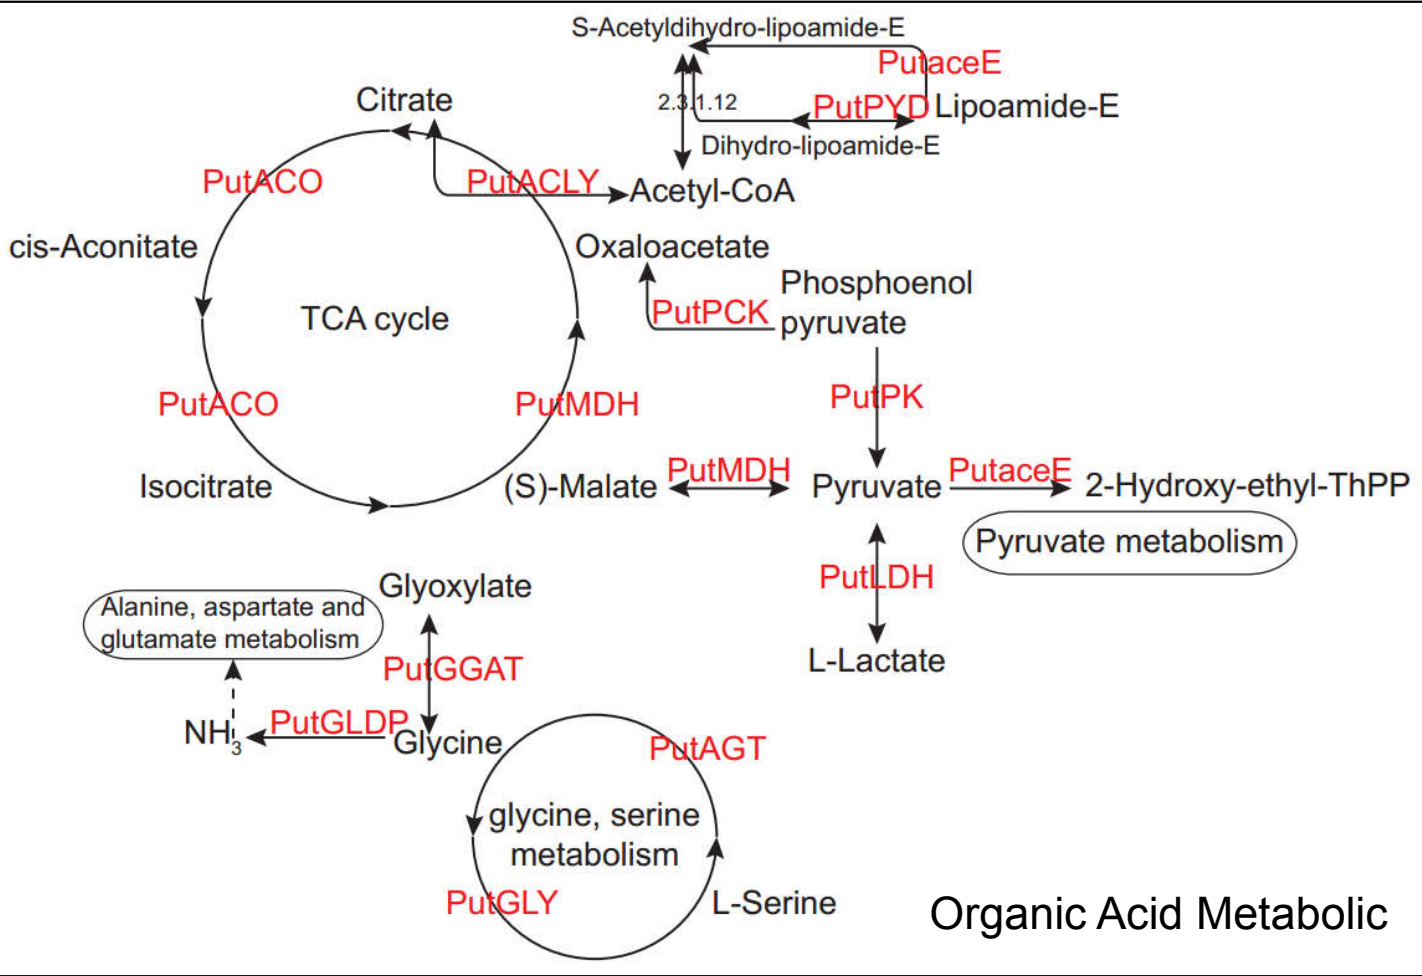

Supplement: 12864_2019_5860_MOESM7_ESM.pdf [file 12864_2019_5860_MOESM7_ESM.pdf]
